# Supplementary material
Source: PubMed Central journal article supplement (PMC6521953)
Supplement: NIHMS1028400-supplement-Supporting_Infpormation.pdf [file NIHMS1028400-supplement-Supporting_Infpormation.pdf]

Supporting Information for

**<sup>19</sup>F Dynamic Nuclear Polarization at Fast Magic Angle Spinning for NMR of HIV-1  
Capsid Protein Assemblies**

Manman Lu<sup>1,2,3,#</sup>, Mingzhang Wang<sup>1,2,#</sup>, Ivan V. Sergeyev<sup>4,#</sup>, Caitlin M. Quinn<sup>1</sup>, Jochem Struppe<sup>4</sup>,  
Melanie Rosay<sup>4</sup>, Werner Maas<sup>4</sup>, Angela M. Gronenborn<sup>2,3\*</sup>, Tatyana Polenova<sup>1,2\*</sup>

<sup>1</sup>Department of Chemistry and Biochemistry, University of Delaware, Newark, Delaware 19716, United States; <sup>2</sup>Pittsburgh Center for HIV Protein Interactions, University of Pittsburgh School of Medicine, 1051 Biomedical Science Tower 3, 3501 Fifth Ave., Pittsburgh, PA 15261, United States; <sup>3</sup>Department of Structural Biology, University of Pittsburgh School of Medicine, 3501 Fifth Ave., Pittsburgh, PA 15261, United States; <sup>4</sup>Bruker Biospin Corporation, 15 Fortune Drive, Billerica, MA, United States

#These authors have contributed equally

\***Corresponding authors:** Angela M. Gronenborn, Department of Structural Biology, University of Pittsburgh School of Medicine, 3501 Fifth Ave., Pittsburgh, PA 15260, USA, Tel.: (412) 648-9959; Email: [amg100@pitt.edu](mailto:amg100@pitt.edu); Tatyana Polenova, Department of Chemistry and Biochemistry, University of Delaware, Newark, DE, USA, Tel.: (302) 831-1968; Email: [tpolenov@udel.edu](mailto:tpolenov@udel.edu)

**Keywords:** magic angle spinning, <sup>19</sup>F NMR, HIV-1 capsid, DNP

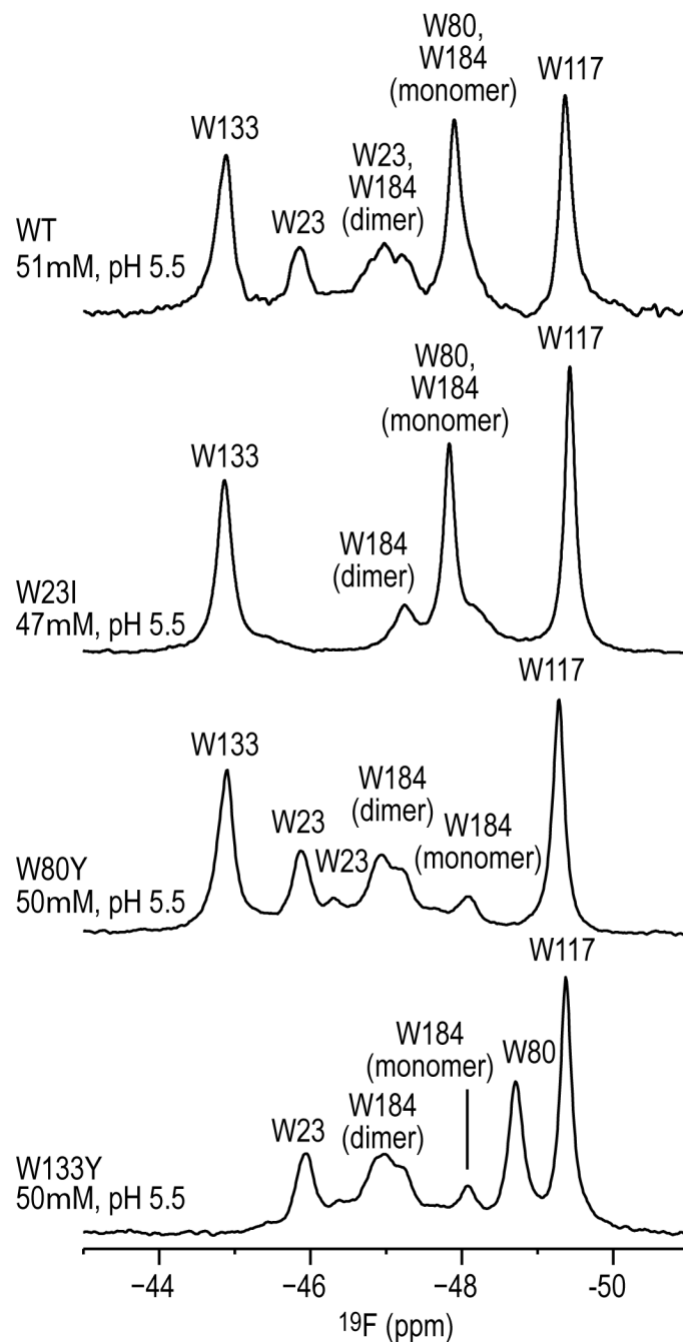

**Figure S1.**  $^{19}\text{F}$  solution NMR spectra of (top to bottom) 5- $^{19}\text{F}$ -Trp, U- $^{15}\text{N}$  CA (top) and 5- $^{19}\text{F}$ -Trp, U- $^{15}\text{N}$  CA mutants W23I, W80Y, and W133Y. The spectra were recorded at 14.1 T (564.8 MHz  $^{19}\text{F}$  Larmor frequency). The sample conditions are listed next to each spectrum. Assignments are shown on top.

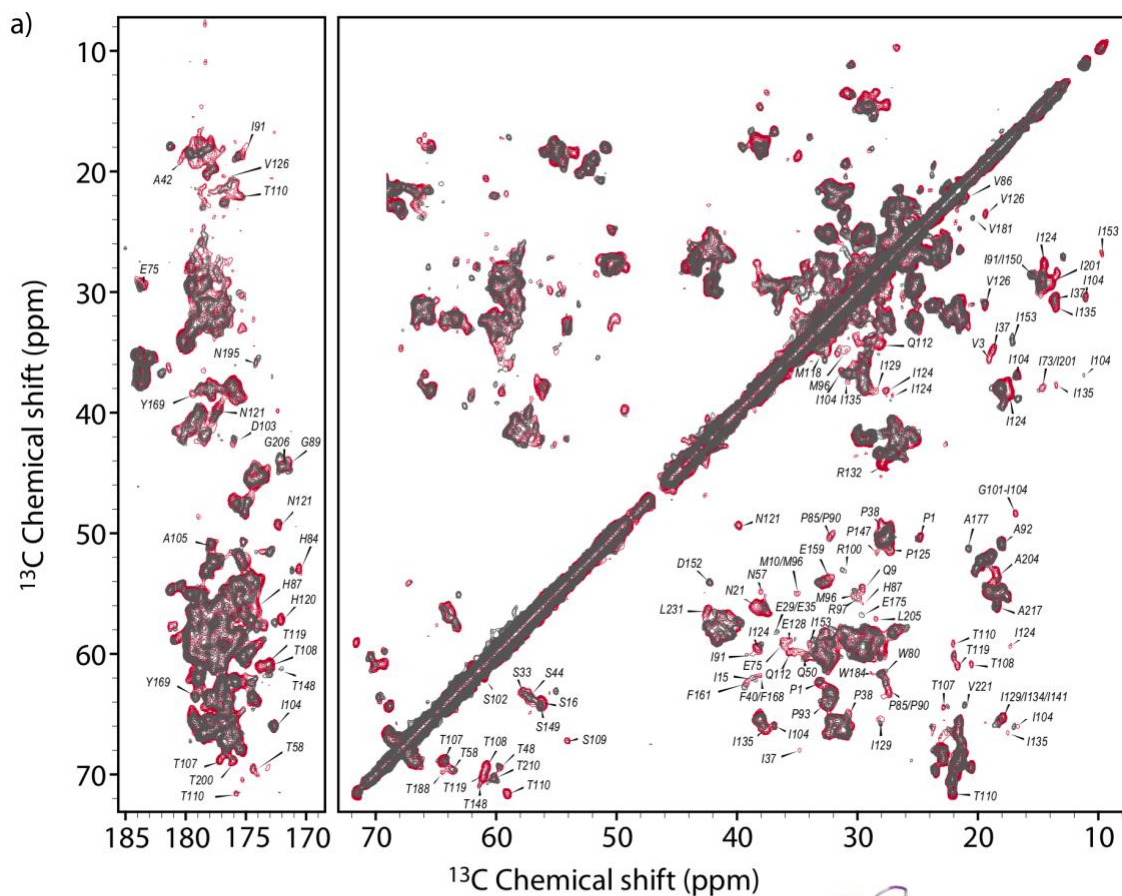

b) 5F-Trp CA tubular assemblies

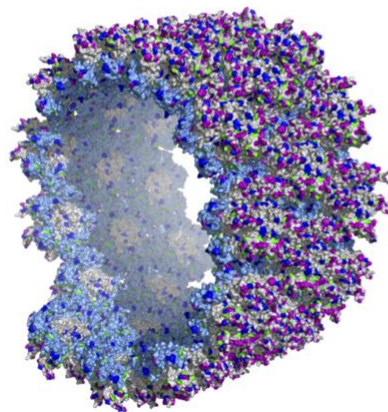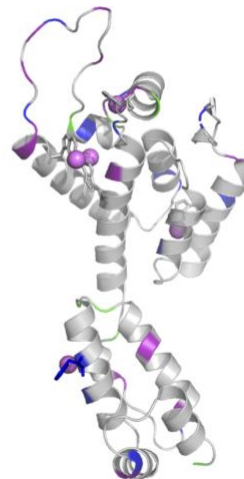

Residues highlighted in CA structures: shifted, decreased intensity, increased intensity

**Figure S2.** (a) Superposition of  $^{13}\text{C}$ - $^{13}\text{C}$  RFDR spectra of 5F-Trp, U- $^{13}\text{C}$ ,  $^{15}\text{N}$  CA tubular assemblies in the absence (red) and presence of 12 mM AMUPol (grey) at 290 K, 19.96 T (Larmor frequencies 850.4 MHz ( $^1\text{H}$ ) and 213.8 MHz ( $^{13}\text{C}$ )), and 40 kHz MAS. (b) Residues whose resonances are affected by the biradical doping are mapped onto a 3D model of a section of the CA tube (PDBID: 3j4f) and the CA monomer (PDBID: 4XFX). These residues are colored in purple (peak shift), blue (decreased peak intensity), and green (increased peak intensity). The five 5F-Trp residues (W23, W80, W117, W133 and W184) are shown in stick representation, and the fluorine atoms as purple spheres.

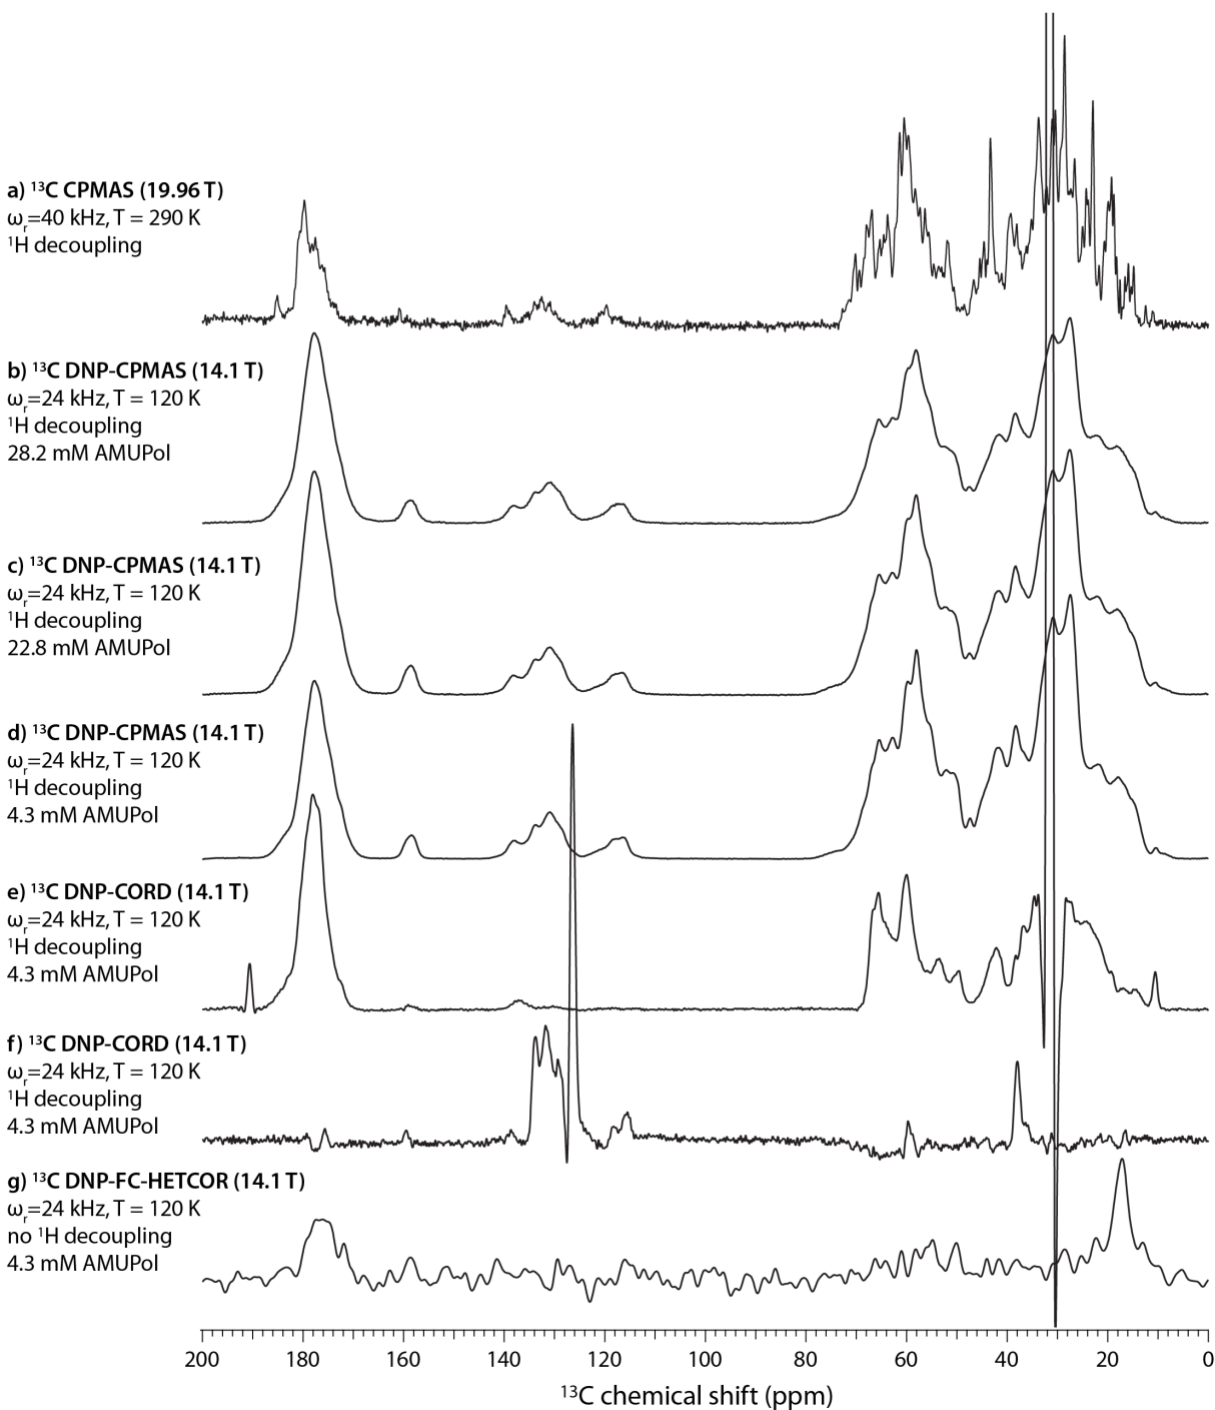

**Figure S3.** a) 1D  $^{13}\text{C}$  CPMAS spectrum of 5F-Trp CA assemblies acquired at 19.96 T, T = 290 K, and MAS frequency of 40 kHz.  $^1\text{H}$  decoupling was performed with 10 kHz TPPM. b)-d) DNP-enhanced  $^{13}\text{C}$  CPMAS spectra of 5F-Trp CA assemblies doped with 28.2, 22.8, and 4.3 mM AMUPol. e)-g) 1D traces extracted from a 2D DNP-enhanced CORD (e,f) and 2D DNP-enhanced  $^{19}\text{F}$ - $^{13}\text{C}$  HETCOR spectra of 5F-Trp CA assemblies doped with 4.3 mM AMUPol. The spectra shown in b)-g) were acquired at 14.1 T, T = 120 K, and a MAS frequency of 24 kHz. In b)-f),  $^1\text{H}$  decoupling was performed with 166.7 kHz SPINAL-64. In g), no  $^1\text{H}$  decoupling was applied.

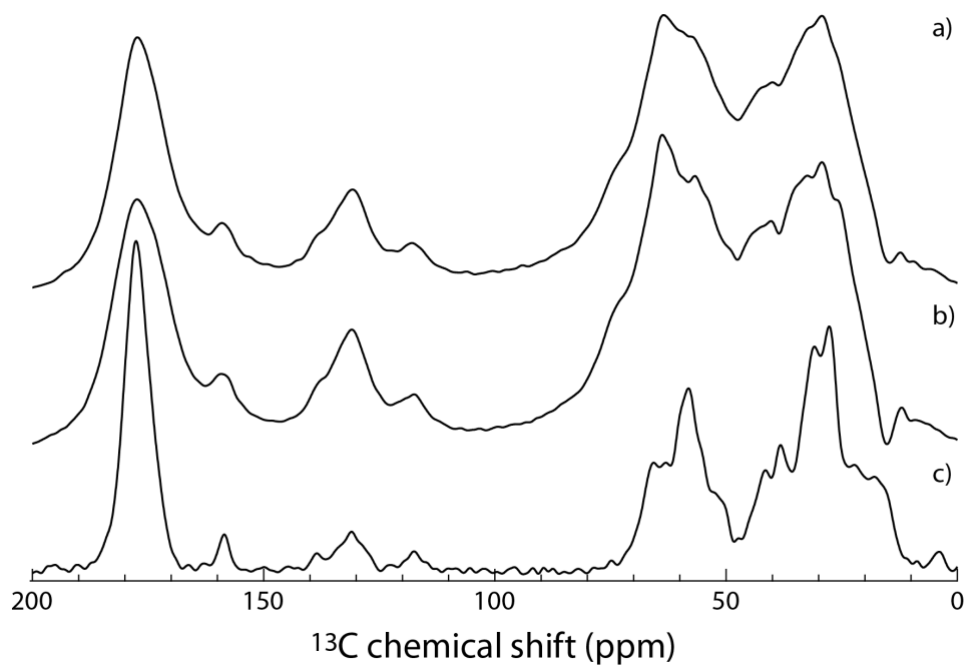

**Figure S4.** Single-pulse-excitation DNP-enhanced MAS NMR spectra of 5F-Trp CA assemblies doped with a) 28.2 mM AMUPol, b) 22.8 mM AMUPol, and c) 4.3 mM AMUPol. The spectra were acquired with 16 scans at 14.1 T,  $T = 120$  K, microwave power of 13.8 W, and a MAS frequency of 24 kHz.  $^1\text{H}$  decoupling was performed with 166.7 kHz SPINAL-64.

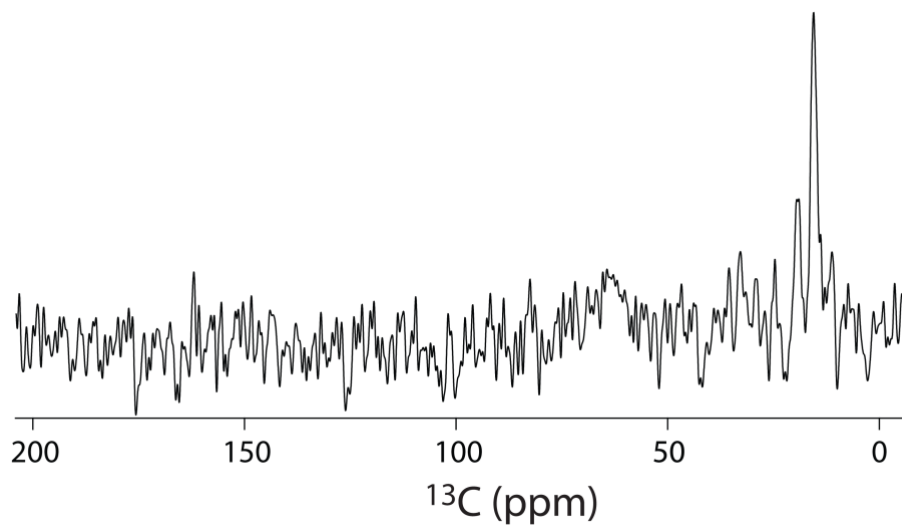

**Figure S5.**  $^{19}\text{F}$ - $^{13}\text{C}$  CPMAS NMR spectrum of 5F-Trp A14C/E45C/W184A/M185A CA cross-linked hexamer tubular assemblies at 290 K, 19.96 T (Larmor frequencies 850.4 MHz ( $^1\text{H}$ ), 800.1 MHz ( $^{19}\text{F}$ ), and 213.8 MHz ( $^{13}\text{C}$ )), and 40 kHz MAS. The spectrum was acquired with 43,008 scans, total experiment time was 24 hours. 10 kHz  $^1\text{H}$  decoupling was applied during acquisition.

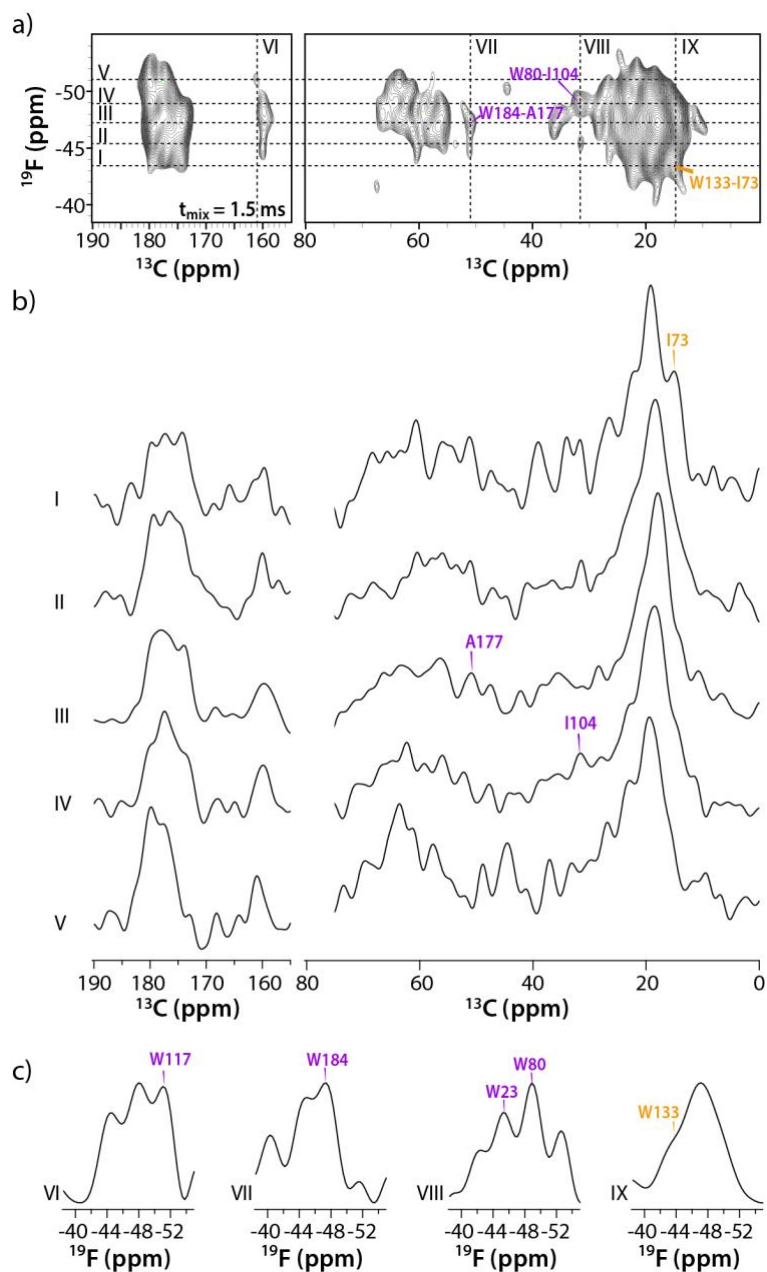

**Figure S6.** a) 2D  $^{19}\text{F}$ - $^{13}\text{C}$  DNP-enhanced HETCOR spectrum of 5F-Trp, U- $^{13}\text{C}$ ,  $^{15}\text{N}$  CA tubular assemblies. b-c) One-dimensional traces extracted from the spectrum. The spectrum was acquired at 14.1 T (564.8 MHz  $^{19}\text{F}$  Larmor frequency) with a MAS frequency of 24 kHz. The mixing time was 1.5 ms. The contour levels are set to 3.5 X the noise.

**Table S1.** Chemical shift perturbations, peak intensity changes, and peak line widths in  $^{13}\text{C}$ - $^{13}\text{C}$  RFDR MAS NMR spectra of tubular assemblies of 5F-Trp, U- $^{13}\text{C}$ ,  $^{15}\text{N}$  CA in the presence of 12 mM AMUPol compared to the non-doped sample.

| Residue | Weaker or missing | Stronger | Shift (backbone atom) > 0.3 ppm |       |       | Line width (Hz) |           |              |
|---------|-------------------|----------|---------------------------------|-------|-------|-----------------|-----------|--------------|
|         |                   |          | Peak                            | CSP 1 | CSP 2 | Peak            | No AMUPol | 12 mM AMUPol |
| Q9      | CA-CB             |          |                                 |       |       |                 |           |              |
| M10     | CA-CB             |          |                                 |       |       |                 |           |              |
| S16     | CA-CB             |          | CA-CB                           | 0.3   | 0.1   |                 |           |              |
| N21     | CA-CB             |          |                                 |       |       |                 |           |              |
| I37     | CA-CB             |          |                                 |       |       |                 |           |              |
| N57     | CA-CB             |          |                                 |       |       |                 |           |              |
| T58     | CB-CO             |          |                                 |       |       | CA-CG           | 100.6     | 104.4        |
| L83     | CA-CB             |          | CA-CB                           | 0.4   | 0.2   |                 |           |              |
| H84     |                   |          | CA-CO                           | 0.2   | 0.6   | CA-CO           | 96.8      | 82.7         |
| P85/P90 | CA-CG             |          |                                 |       |       |                 |           |              |
| H87     | CA-CB             |          | CA-CO                           | 0.3   | 0.1   |                 |           |              |
| G89     |                   |          | CA-CO                           | 0.3   | 0.6   |                 |           |              |
| P93     |                   |          | CA-CB                           | 0.3   | 0.2   |                 |           |              |
| M96     |                   |          | CA-CB                           | 0.3   | 0.0   | CA-CB           | 200.0     | 149.7        |
| R100    |                   | CA-CB    |                                 |       |       |                 |           |              |
| S102    | CA-CB             |          |                                 |       |       |                 |           |              |
| T107    | CA-CB             | CA-CG    |                                 |       |       | CA-CG           | 77.6      | 137.8        |
| T108    | CA-CB             | CA-CG    | CA-CO                           | 0.4   | 0.1   | CA-CG           | 91.8      | 200.0        |
| S109    | CA-CB             |          |                                 |       |       |                 |           |              |
| T110    | CA-CB             | CA-CG    |                                 |       |       | CA-CG           | 89.7      | 200.0        |
| T119    | CA-CB             | CA-CG    |                                 |       |       |                 |           |              |
| H120    |                   |          | CA-CO                           | 0.3   | 0.5   | CA-CO           | 106.8     | 120.6        |
| N121    | CA-CB             | CA-CO    | CB-CO                           | 0.1   | 0.3   |                 |           |              |
| I124    | CA-CB             |          |                                 |       |       | CA-CG           | 132.0     | 72.2         |
| I129    |                   |          | CA-CG1                          | 0.4   | 0.2   |                 |           |              |
| T148    |                   | CA-CB    |                                 |       |       |                 |           |              |
| I153    | CA-CB             |          | CA-CB                           | 0.4   | 0.4   | CA-CB           | 99.6      | 118.6        |
| E159    | CA-CB             |          |                                 |       |       |                 |           |              |
| F161    |                   |          | CA-CB                           | 0.3   | 0.2   | CA-CB           | 199.9     | 200.0        |
| Y169    |                   |          | CB-CO                           | 0.3   | 0.5   |                 |           |              |
| E175    |                   | CA-CB    |                                 |       |       |                 |           |              |
| A177    |                   | CA-CB    |                                 |       |       | CA-CB           | 142.0     | 117.7        |
| W184    | CA-CB             |          |                                 |       |       |                 |           |              |
| T188    | CA-CB             |          |                                 |       |       |                 |           |              |



|      |       |       |       |     |     |  |  |  |
|------|-------|-------|-------|-----|-----|--|--|--|
| A204 | CA-CB |       | CA-CB | 0.3 | 0.1 |  |  |  |
| L205 | CA-CG |       |       |     |     |  |  |  |
| V221 |       | CA-CG |       |     |     |  |  |  |
| L231 | CA-CB |       |       |     |     |  |  |  |

**Table S2.** Sensitivity of  $^{19}\text{F}$  MAS NMR and DNP-enhanced MAS NMR experiments on 5F-Trp,  $\text{U-}^{13}\text{C}, ^{15}\text{N}$  CA.

| Sample                                                             | Sample amount (mg) | Field strength (T) | MAS frequency (kHz) | Temperature (K) | Microwave power (W) | Recycle delay (s) | SNR*  | ASR** |   |
|--------------------------------------------------------------------|--------------------|--------------------|---------------------|-----------------|---------------------|-------------------|-------|-------|---|
| 5F-Trp, $\text{U-}^{13}\text{C}, ^{15}\text{N}$ CA                 | 14.6               | 19.95              | 24                  | 290             | 0                   | 8                 | 0.016 | -     |   |
|                                                                    |                    |                    |                     |                 | 0                   | 10                | 0.015 | -     |   |
| 5F-Trp, $\text{U-}^{13}\text{C}, ^{15}\text{N}$ CA, 4.3 mM AMUPol  | 11.0               | 14.1               | 24                  | 120             | 13.8                | 4                 | 0.200 | 12    |   |
|                                                                    |                    |                    |                     |                 |                     | 6                 | 0.191 | 12    |   |
|                                                                    |                    |                    |                     |                 |                     | 8                 | 0.195 | 12    |   |
|                                                                    |                    |                    |                     |                 |                     | 16                | 0.198 | 12    |   |
|                                                                    |                    |                    |                     |                 |                     | 64                | 0.146 | 9     |   |
| 5F-Trp, $\text{U-}^{13}\text{C}, ^{15}\text{N}$ CA, 22.8 mM AMUPol | 11.7               | 14.1               | 24                  | 120             | 0                   | 10                | 0.007 | -     |   |
|                                                                    |                    |                    |                     |                 | 4                   | 0.236             | 15    |       |   |
|                                                                    |                    |                    |                     |                 | 6                   | 0.391             | 24    |       |   |
|                                                                    |                    |                    |                     |                 | 8                   | 0.342             | 21    |       |   |
|                                                                    |                    |                    |                     |                 | 16                  | 0.296             | 18    |       |   |
| 5F-Trp, $\text{U-}^{13}\text{C}, ^{15}\text{N}$ CA, 28.2 mM AMUPol | 11.6               | 14.1               | 24                  | 120             | 13.8                | 64                | 0.226 | 14    |   |
|                                                                    |                    |                    |                     |                 |                     | 0                 | 60    | 0.012 | - |
|                                                                    |                    |                    |                     |                 |                     | 4                 | 0.475 | 29    |   |
|                                                                    |                    |                    |                     |                 |                     | 6                 | 0.460 | 28    |   |
|                                                                    |                    |                    |                     |                 |                     | 8                 | 0.408 | 25    |   |
|                                                                    | 16                 | 0.458              | 28                  |                 |                     |                   |       |       |   |
|                                                                    | 64                 | 0.355              | 22                  |                 |                     |                   |       |       |   |

\*Signal-to-noise ratio, for the maximum-intensity peak, per unit of experiment time per mg of sample. No  $^1\text{H}$  decoupling was used in any of the experiments.

\*\*The absolute sensitivity ratio between the DNP-enhanced experiments at cryogenic temperatures and non-DNP experiments at 290 K acquired at optimum recycle delays range from 12 to 29, taking into account the dependence of the signal intensity on the magnetic field strength ( $B_0^{3/2}$ ).

**Table S3.** Tentative assignments of correlations in the  $^{19}\text{F}$ - $^{13}\text{C}$  DNP-enhanced HETCOR spectrum.

| Distance (Å) | Assignments   | $^{19}\text{F}$ (ppm) | $^{13}\text{C}$ (ppm) | Appear<br>tmix (ms) | Disappear<br>tmix (ms) |
|--------------|---------------|-----------------------|-----------------------|---------------------|------------------------|
| 6.0          | W117F-P99CA   | -51.4                 | 62.5                  | 0.5                 | 5                      |
| 6.1          | W117F-T110CG2 | -50.8                 | 21.5                  | 0.5                 |                        |
| 7.5          | W133F-T107CG2 | -43.1                 | 22.8                  | 0.5                 |                        |
| 7.9          | W133F-V126CG1 | -43.1                 | 22.9                  | 0.5                 |                        |
| 7.8          | W184F-I150C   | -47.1                 | 175.5                 | 0.5                 |                        |
| 6.6          | W184F-I150CG2 | -47.7                 | 18.0                  | 0.5                 |                        |
| 7.0          | W184F-L151CA  | -47.1                 | 56.6                  | 0.5                 |                        |
| 6.4          | W184F-L151CD1 | -47.3                 | 23.8                  | 0.5                 |                        |
| 4.4          | W184F-M185CB  | -47.6                 | 31.8                  | 0.5                 | 1.5                    |
| 7.9          | W184F-N183C   | -47.1                 | 175.4                 | 0.5                 |                        |
| 6.5          | W184F-T188C   | -47.1                 | 174.5                 | 0.5                 |                        |
| 5.8          | W184F-T188CG2 | -47.1                 | 21.9                  | 0.5                 |                        |
| 7.6          | W184F-V181CB  | -47.6                 | 31.8                  | 0.5                 | 1.5                    |
| 6.4          | W184F-V181CG1 | -47.4                 | 23.8                  | 0.5                 |                        |
| 5.2          | W23F-I37C     | -45.3                 | 176.1                 | 0.5                 |                        |
| 7.3          | W23F-I37CG2   | -45.3                 | 18.5                  | 0.5                 |                        |
| 8.0          | W23F-L43C     | -45.3                 | 176.1                 | 0.5                 |                        |
| 6.0          | W23F-L43CG    | -45.4                 | 27.1                  | 0.5                 |                        |
| 5.7          | W23F-M55CE    | -45.5                 | 16.0                  | 0.5                 |                        |
| 7.5          | W23F-S41C     | -45.3                 | 176.1                 | 0.5                 |                        |
| 5.6          | W23F-V26CG2   | -45.6                 | 22.4                  | 0.5                 |                        |
| 4.8          | W23F-V36CG1   | -45.6                 | 22.5                  | 0.5                 |                        |
| 7.5          | W80F-E79C     | -48.7                 | 178.2                 | 0.5                 |                        |
| 6.8          | W80F-H84CA    | -48.4                 | 54.4                  | 0.5                 |                        |
| 7.4          | W80F-I104CB   | -47.4                 | 35.6                  | 0.5                 | 2.5                    |
| 5.2          | W80F-I104CD1  | -48.6                 | 12.0                  | 0.5                 | 2.5                    |
| 7.1          | W80F-I104CG2  | -47.7                 | 18.0                  | 0.5                 |                        |
| 7.1          | W80F-I129C    | -48.7                 | 178.3                 | 0.5                 |                        |
| 6.1          | W80F-I129CA   | -48.9                 | 64.6                  | 0.5                 | 5                      |
| 4.2          | W80F-I129CG1  | -48.5                 | 26.6                  | 0.5                 |                        |
| 4.4          | W80F-I129CG2  | -47.7                 | 18.0                  | 0.5                 |                        |
| 7.7          | W80F-P125C    | -48.7                 | 178.2                 | 0.5                 |                        |
| 6.3          | W80F-R132CZ   | -48.2                 | 159.6                 | 0.5                 |                        |

|      |              |       |       |     |     |
|------|--------------|-------|-------|-----|-----|
| 8.0  | W80F-V126CA  | -48.9 | 64.7  | 0.5 | 5   |
| 5.9  | W80F-W80CA   | -48.7 | 63.1  | 0.5 | 2.5 |
| 5.6  | W80F-W80CB   | -48.5 | 26.6  | 0.5 |     |
| 6.7  | W133F-I73CD1 | -43.4 | 14.9  | 1.5 | 2.5 |
| 8.8  | W184F-A177CA | -47.3 | 50.9  | 1.5 | 5   |
| 8.0  | W184F-K182CA | -46.4 | 61.1  | 1.5 | 5   |
| 6.0  | W184F-L189CA | -46.7 | 58.4  | 1.5 |     |
| 4.3  | W184F-M185CA | -46.7 | 58.4  | 1.5 |     |
| 7.9  | W184F-T186CA | -48.0 | 66.5  | 1.5 | 5   |
| 6.5  | W184F-T188CA | -47.3 | 63.9  | 1.5 | 2.5 |
| 7.4  | W184F-V181CA | -48.0 | 66.5  | 1.5 | 5   |
| 6.1  | W184F-W184CA | -46.4 | 61.1  | 1.5 | 5   |
| 7.3  | W23F-L43CA   | -45.3 | 55.8  | 1.5 |     |
| 6.5  | W80F-I104CG1 | -49.0 | 31.6  | 1.5 | 2.5 |
| 10.4 | W133F-R100CZ | -44.1 | 160.4 | 2.5 |     |
| 10.9 | W133F-R132CZ | -44.1 | 160.4 | 2.5 |     |
| 7.8  | W184F-I150CB | -47.2 | 39.5  | 2.5 |     |
| 8.7  | W23F-A31CA   | -45.9 | 53.7  | 2.5 | 5   |
| 8.2  | W23F-A42CA   | -45.9 | 53.7  | 2.5 | 5   |
| 7.7  | W23F-L138CB  | -45.6 | 41.4  | 2.5 |     |
| 4.0  | W23F-M39CB   | -46.4 | 32.2  | 2.5 |     |
| 7.6  | W23F-M55CB   | -46.4 | 32.2  | 2.5 |     |
| 7.6  | W23F-S41CB   | -45.1 | 63.8  | 2.5 | 5   |
| 7.9  | W23F-S44CB   | -45.1 | 63.8  | 2.5 | 5   |
| 7.9  | W23F-V24CA   | -45.1 | 63.8  | 2.5 | 5   |
| 8.0  | W117F-L111CB | -50.6 | 40.0  | 5   |     |
| 9.5  | W117F-M96CA  | -50.5 | 56.1  | 5   |     |
| 8.4  | W117F-M96CG  | -50.8 | 30.4  | 5   |     |
| 8.2  | W117F-R100CB | -50.8 | 30.4  | 5   |     |
| 9.1  | W117F-R97CA  | -50.5 | 56.1  | 5   |     |
| 8.7  | W117F-R97CB  | -50.8 | 30.4  | 5   |     |
| 9.9  | W133F-E75CG  | -42.5 | 34.9  | 5   |     |
| 9.7  | W133F-E79CG  | -42.5 | 34.9  | 5   |     |
| 9.6  | W133F-G127C  | -42.0 | 174.7 | 5   |     |
| 9.4  | W184F-K182CB | -47.5 | 34.0  | 5   |     |
| 9.1  | W23F-K25CA   | -44.8 | 60.4  | 5   |     |
| 9.5  | W23F-K30CA   | -44.3 | 56.2  | 5   |     |
| 8.6  | W23F-M55CA   | -44.8 | 60.4  | 5   |     |

|      |             |       |       |   |
|------|-------------|-------|-------|---|
| 7.7  | W23F-P38CG  | -45.1 | 27.8  | 5 |
| 10.0 | W80F-A78C   | -48.3 | 182.3 | 5 |
| 10.6 | W80F-E79CD  | -48.3 | 182.3 | 5 |
| 10.0 | W80F-E79CG  | -48.0 | 35.5  | 5 |
| 11.9 | W80F-E98CD  | -48.3 | 182.3 | 5 |
| 9.8  | W80F-Y130CB | -48.0 | 35.5  | 5 |

---

**Table S4.**  $^{19}\text{F}$ - $^{19}\text{F}$  distances in the hexamer structure of the HIV-1 CA protein.

| PDB 4XFX*  | CA NL4-3                    |      |      |      |         |
|------------|-----------------------------|------|------|------|---------|
| 5-F-Trp-CA | W23                         | W80  | W117 | W133 | W184    |
|            | Intramolecular Distance (Å) |      |      |      |         |
| W23        | 20.0                        | 23.1 | 23.4 | 19.1 | 28.6    |
| W80        | 33.3                        | 34.1 | 12.6 | 8.8  | 33.1    |
| W117       | 25.1                        | 21.7 | 28.5 | 9.8  | 42.5    |
| W133       | 26.2                        | 28.6 | 27.2 | 33.0 | 33.8    |
| W184       | 33.0                        | 35.8 | 32.2 | 27.6 | 2.1-9.4 |
| F-F        | Intermolecular Distance (Å) |      |      |      |         |

\*F atoms were added at the 5 position of the indole ring of all tryptophans.
